# Supplementary material
Source: PubMed Central journal article supplement (PMC4788043)
Supplement: norr812495.ww1_default.pdf [file norr812495.ww1_default.pdf]

**Table A:** Variables available for model [posted as supplied by author]

| Variable Name                                                               | Variable type            | Comments                                                                                                                                                                                                                                                                                                                                                                                                                                                                                                          |
|-----------------------------------------------------------------------------|--------------------------|-------------------------------------------------------------------------------------------------------------------------------------------------------------------------------------------------------------------------------------------------------------------------------------------------------------------------------------------------------------------------------------------------------------------------------------------------------------------------------------------------------------------|
| Age                                                                         | Continuous               | Linear relationship with pre-eclampsia                                                                                                                                                                                                                                                                                                                                                                                                                                                                            |
| Participant's birthweight                                                   | Continuous               | Data was self reported, but women were asked to bring their 'birth record' if kept at home. Birthweight and gestational age at delivery was confirmed from this birth record in 70% and 46%, respectively. 6% missing, imputed                                                                                                                                                                                                                                                                                    |
| History of any miscarriage after 10 weeks of gestation                      | 0 No<br>1 Yes            |                                                                                                                                                                                                                                                                                                                                                                                                                                                                                                                   |
| History of one miscarriage $\leq$ 10 weeks to same partner (father of baby) | 0 No<br>1 Yes            |                                                                                                                                                                                                                                                                                                                                                                                                                                                                                                                   |
| Hypertension on combined oral contraception (OC)                            | 0 No<br>1 Yes            | Participant has been told on more than one occasion that her blood pressure was elevated by health care worker when on combined OC or had ceased the OC because of raised blood pressure                                                                                                                                                                                                                                                                                                                          |
| Doctor diagnosed asthma                                                     | 0 No<br>1 Yes            | Asthma diagnosed by medical practitioner                                                                                                                                                                                                                                                                                                                                                                                                                                                                          |
| Family history of gestational hypertension                                  | 0 No<br>1 Yes            | Mother or sister(s) developed gestational hypertension defined as new onset hypertension in second half of pregnancy and known to not have proteinuria. If one or more family member had gestational hypertension=Yes; no family history of gestational hypertension or no family history available=No.                                                                                                                                                                                                           |
| Family history of pre-eclampsia                                             | 0 No<br>1 Yes            | Mother or sister(s) developed pre-eclampsia defined as new onset hypertension in second half of pregnancy with proteinuria or other multisystem complications (e.g., HELLP, eclampsia)<br>If one or more family member had pre-eclampsia=Yes; no family history of pre-eclampsia or no family history available=No.                                                                                                                                                                                               |
| Family history of chronic hypertension                                      | 0 No<br>1 Yes            | Self reported.Woman's father, mother or sibling(s) has a history of hypertension or high blood pressure, usually on antihypertensive treatment. If one or more family member had chronic hypertension=Yes; no family history of chronic hypertension or no family history available=No.                                                                                                                                                                                                                           |
| Participant's father has coronary heart disease                             | 0 No<br>1 Yes            | Self reported. From standard operating procedure: Father of woman has had angina, a heart attack, coronary heart disease, coronary bypass or angioplasty. If father had coronary heart disease=Yes; no paternal history of coronary heart disease or no paternal history available=No.                                                                                                                                                                                                                            |
| Family history of coronary heart disease                                    | 0 No<br>1 Yes            | Self reported From standard operating procedure: Woman's father, mother or sibling(s) has had angina, a heart attack, coronary heart disease, coronary bypass or angioplasty. If one or more family member had coronary heart disease=Yes; no family history of coronary heart disease or no family history available=No.                                                                                                                                                                                         |
| Family history of Type 2 diabetes                                           | 0 No<br>1 Yes            | Self reported. Woman's father, mother or sibling(s) has type 2 diabetes. From standard operating procedure: Type 2 diabetes is usually adult onset diabetes that is controlled with diet, tablets and sometimes insulin. Age of onset is usually in adult life, but increasingly common in the young and obese. Unusual to develop Type 2 diabetes at <15 years unless very obese. If one or more family member had Type 2 diabetes =Yes; no family history of Type 2 diabetes or no family history available=No. |
| Months of sexual relationship with partner $\leq$ 3 months                  | 0 No or unknown<br>1 Yes | 0.1% missing, missing replaced with median                                                                                                                                                                                                                                                                                                                                                                                                                                                                        |
| Months of sexual relationship with partner $\leq$ 6 months                  | 0 No or unknown<br>1 Yes | 0.1% missing, median replaced with median                                                                                                                                                                                                                                                                                                                                                                                                                                                                         |

|                                                  |               |                                                                                                                                                                                                                                                                                                       |
|--------------------------------------------------|---------------|-------------------------------------------------------------------------------------------------------------------------------------------------------------------------------------------------------------------------------------------------------------------------------------------------------|
| ≥12 months to conceive                           | 0 No<br>1 Yes | 0.3% missing, median replaced with median                                                                                                                                                                                                                                                             |
| Hyperemesis at 15±1 weeks                        | 0 No<br>1 Yes | Hyperemesis defined as repeated vomiting in early pregnancy not due to other causes (e.g., gastroenteritis) requiring any of the following: inpatient admission, day stay with IV fluids, nasogastric feeding (at home or in hospital) or vomiting associated with loss of >5% of her booking weight. |
| Hospital admission for hyperemesis               | 0 No<br>1 Yes |                                                                                                                                                                                                                                                                                                       |
| Vaginal bleeding ≥5 days before 15±1 weeks       | 0 No<br>1 Yes |                                                                                                                                                                                                                                                                                                       |
| High fruit intake pre-pregnancy                  | 0 No<br>1 Yes | ≥ 3 pieces of fruit per day in the 3 months pre pregnancy                                                                                                                                                                                                                                             |
| High fruit intake at 15±1 weeks                  | 0 No<br>1 Yes | ≥ 3 pieces of fruit per day at 15±1 weeks                                                                                                                                                                                                                                                             |
| High green leafy vegetable intake pre-pregnancy  | 0 No<br>1 Yes | ≥ 3 servings green leafy vegetables per day in the 3 months pre pregnancy                                                                                                                                                                                                                             |
| High green leafy vegetable intake at 15±1 weeks  | 0 No<br>1 Yes | ≥ 3 servings green leafy vegetables per day at 15±1 weeks                                                                                                                                                                                                                                             |
| Folate dose in 1 <sup>st</sup> trimester         | continuous    | Folate dose/day µg in the first trimester. Total folate dose includes both folate tablets and folate in multivitamin preparations e.g., if a woman is on 800µg folate plus a multivitamin containing 800µg, total dose=1600 µg                                                                        |
| Number of cigarettes                             | continuous    | Number of cigarettes smoked per day                                                                                                                                                                                                                                                                   |
| Alcohol in 1 <sup>st</sup> trimester             | 0 No<br>1 Yes | Any alcohol consumed in the first trimester                                                                                                                                                                                                                                                           |
| Systolic blood pressure at 15±1 weeks            | Continuous    | First measurement of systolic blood pressure, linear relationship with rate of pre-eclampsia                                                                                                                                                                                                          |
| Diastolic blood pressure at 15±1 weeks           | Continuous    | First measurement of diastolic blood pressure, linear relationship with rate of pre-eclampsia                                                                                                                                                                                                         |
| Mean arterial blood pressure (MAP) at 15±1 weeks | Continuous    | Mean arterial blood pressure calculated from first measurement of systolic (sBP) and diastolic blood pressure (dBp) as follows: $MAP = dBp + [(sBP - dBp)/3]$ ; linear relationship with rate of pre-eclampsia                                                                                        |
| Systolic blood pressure at 15±1 weeks            | Continuous    | Second measurement of systolic blood pressure, linear relationship with rate of pre-eclampsia                                                                                                                                                                                                         |
| Diastolic blood pressure at 15±1 weeks           | Continuous    | Second measurement of diastolic blood pressure, linear relationship with rate of pre-eclampsia                                                                                                                                                                                                        |
| Mean arterial blood pressure (MAP) at 15±1 weeks | Continuous    | Mean arterial blood pressure calculated from second measurement of systolic (sBP) and diastolic blood pressure (dBp) as follows: $MAP = dBp + [(sBP - dBp)/3]$ ; linear relationship with rate of pre-eclampsia                                                                                       |
| Pulse at 15±1 weeks                              | Continuous    | Pulse per minute 0.1% missing, imputed; linear relationship with rate of pre-eclampsia                                                                                                                                                                                                                |
| Height at 15±1 weeks                             | Continuous    | Measurement of height without shoes to the nearest cm.                                                                                                                                                                                                                                                |
| Body mass index (BMI) at 15±1 weeks              | Continuous    | $weight (kg) / height^2 (m)$ , linear relationship with rate of pre-eclampsia                                                                                                                                                                                                                         |
| Waist circumference                              | Continuous    | Waist circumference measured, in centimetres, next to the skin at the point half way between the top of the hip (iliac crest) and inferior margin of lowest rib. 0.4% missing, imputed; linear relationship with rate of pre-                                                                         |

|                                                 |               |                                                                                                                                               |
|-------------------------------------------------|---------------|-----------------------------------------------------------------------------------------------------------------------------------------------|
|                                                 |               | eclampsia                                                                                                                                     |
| Femur length <10 <sup>th</sup> centile          | 0 No<br>1 Yes | Femur length (adjusted for gestational age using multiples of the median) <10 <sup>th</sup> centile; 0.3% missing, imputed                    |
| Abnormal umbilical artery resistance index (RI) | 0 No<br>1 Yes | Umbilical artery RI>0.81                                                                                                                      |
| Mean uterine artery RI                          | Continuous    | Mean uterine RI calculated from the right and left uterine artery RI; linear relationship with rate of pre-eclampsia                          |
| Bilateral notches                               | 0 No<br>1 Yes | Diastolic notches in the Doppler waveforms of both the right and left uterine arteries. Reference notch photos provided to ultrasonographers. |
